# Supplementary material for: Co-Stimulatory versus Cell Death Aspects of Agonistic CD40 Monoclonal Antibody Selicrelumab in Chronic Lymphocytic Leukemia
Source: MDPI journal article supplement (doi:10.3390/cancers13123084), 2021-06-21

**Table I** - Patient characteristics.

| ID# | Gender | Age (years) | WBC count x10 <sup>9</sup> /L | CD5/19 (%) | IGHV status | Therapy     |
|-----|--------|-------------|-------------------------------|------------|-------------|-------------|
| 1   | M      | 24          | 160.5                         | 93.8       | UN          | none        |
| 2   | F      | 53          | 90.3                          | 96.4       | UN          | none        |
| 3   | F      | 65          | 66.3                          | 83.9       | M           | none        |
| 4   | M      | 40          | 96.1                          | 91.8       | M           | none        |
| 5   | M      | 57          | 155                           | 79.0       | UN          | yes         |
| 6   | F      | 64          | 89.9                          | 89.0       | UN          | yes         |
| 7   | F      | 72          | 40.2                          | 87.2       | UN          | none        |
| 8   | M      | 57          | 192.1                         | 94.9       | UN          | none        |
| 9   | M      | 24          | 424.2                         | 94.6       | UN          | none        |
| 10  | M      | 59          | 93.4                          | 90.8       | M           | none        |
| 11  | F      | 59          | 88.7                          | 90.8       | M           | none        |
| 12  | F      | 47          | 89.0                          | 97.5       | M           | unkn        |
| 13  | M      | 64          | unkn                          | 95.2       | M           | none        |
| 14  | M      | 82          | 38.9                          | 90.4       | unkn        | none        |
| 15  | M      | 63          | 123.5                         | 97.9       | unkn        | none        |
| 16  | F      | 72          | 40.2                          | 87.2       | UN          | none        |
| 17  | M      | 52          | 85.5                          | 95.8       | M           | none        |
| 18  | F      | 54          | 272.0                         | 95.4       | UN          | yes         |
| 19  | F      | 59          | 166.9                         | 95.9       | M           | none        |
| 20  | F      | 56          | 97.4                          | 90.3       | M           | none        |
| 21  | F      | 64          | 494.0                         | 96.4       | UN          | none        |
| 22  | M      | 44          | 48.4                          | 91.1       | UN          | none        |
| 23  | F      | 64          | 48.8                          | 96.8       | UN          | none        |
| 24  | F      | 43          | 181.53                        | 96.3       | M           | none        |
| 25  | F      | 45          | 80.2                          | 91.4       | M           | none        |
| 26  | F      | 69          | 153.0                         | 95.7       | UN          | yes         |
| 27  | M      | 52          | 85.5                          | 95.8       | M           | none        |
| 28  | F      | 54          | 129.3                         | 97.3       | M           | unkn        |
| 29  | M      | 65          | unkn                          | 92.1       | M           | unkn        |
| 30  | F      | 63          | 99.3                          | 99.1       | unkn        | unkn        |
| 31  | M      | 46          | 300.0                         | 98.1       | UN          | none        |
| 32  | F      | 65          | 64.8                          | 88.0       | UN          | none        |
| 33  | M      | 84          | 194.1                         | 96.4       | UN          | unkn        |
| 34  | F      | 63          | 110.3                         | 92.6       | M           | none        |
| 35  | F      | 68          | 41.9                          | 96.4       | UN          | none        |
| 36  | M      | 75          | 58.4                          | 92.7       | unkn        | none        |
| 37  | F      | 59          | 170.9                         | 97.9       | unkn        | unkn        |
| 38  | F      | 64          | 113.3                         | 93.5       | M           | none        |
| 39  | F      | 63          | 119.2                         | 99.5       | M           | unkn        |
| 40  | F      | 53          | 91.0                          | 98.0       | M           | <i>unkn</i> |
| 41  | M      | 61          | 212.0                         | 97.1       | UN          | <i>unkn</i> |
| 42  | M      | 65          | 114.8                         | 96.9       | UN          | <i>none</i> |
| 43  | F      | 84          | 52.8                          | 95.0       | M           | <i>none</i> |
| 44  | M      | 76          | 111.5                         | 94.9       | UN          | <i>none</i> |
| 45  | M      | 81          | 112.0                         | 97.1       | M           | <i>none</i> |

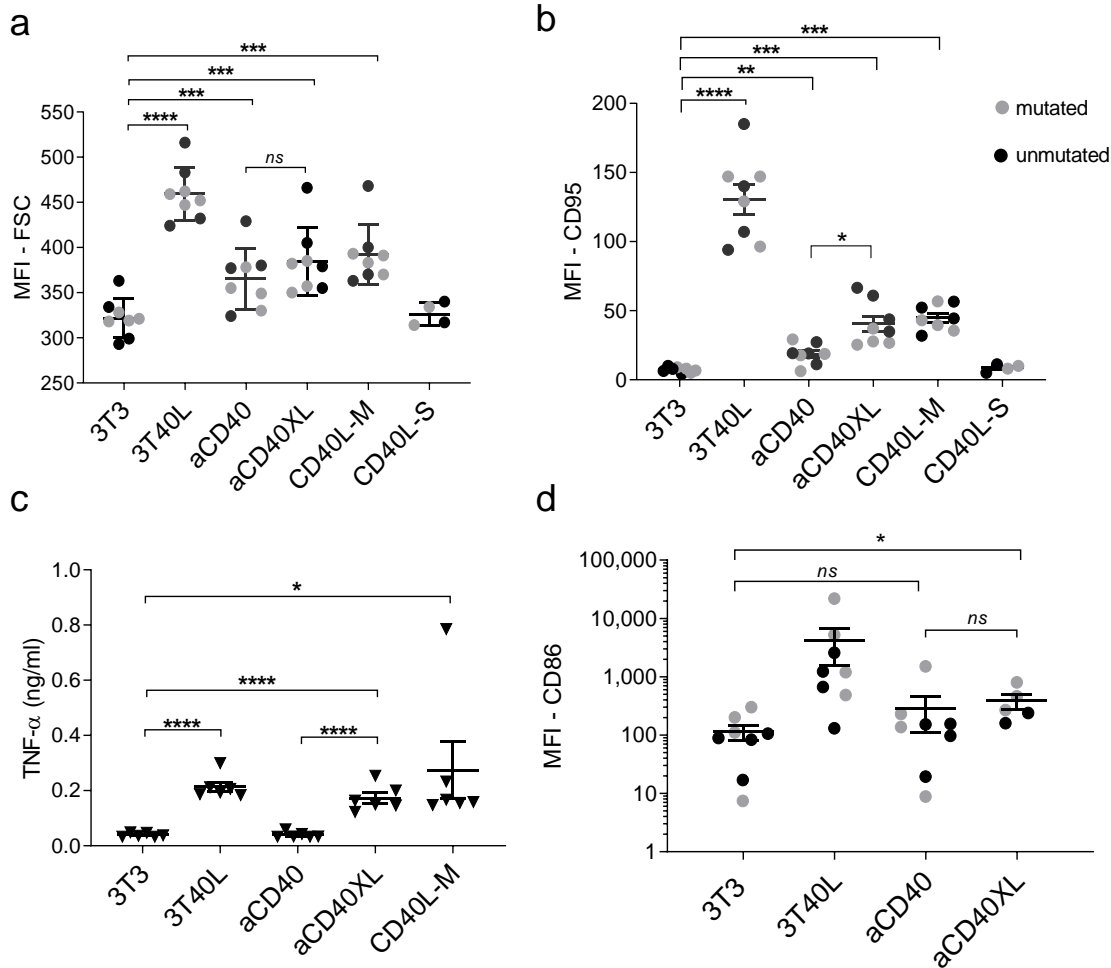

**Figure 1. Activation of CLL cells with selicrelumab and comparison with distinct modes of CD40 stimulation.** CLL cells were cultured for 48/72 h on fibroblasts (3T3), fibroblasts transfected with human CD40L (3T40L), selicrelumab with and without an IgG crosslinker (aCD40  $\pm$  XL), CD40 ligand multimeric construct (CD40L-M) and CD40 ligand single (CD40L-S) for 48 h (n = 8). **A)** Blast formation/cell size accessed by flow cytometry. **B)** CD95 expression accessed by flow cytometry. **C)** TNF- $\alpha$  levels measured in culture supernatants by enzyme-linked immunosorbent assay (ELISA). **D)** CD86 expression accessed by flow cytometry. Grey or black dots (IGHV mutated and unmutated IgHV status respectively) and symbol represent the mean  $\pm$  SEM: \* p < 0.05, \*\* p < 0.01, \*\*\* p < 0.001, \*\*\*\* p < 0.0001 (unpaired t-test).

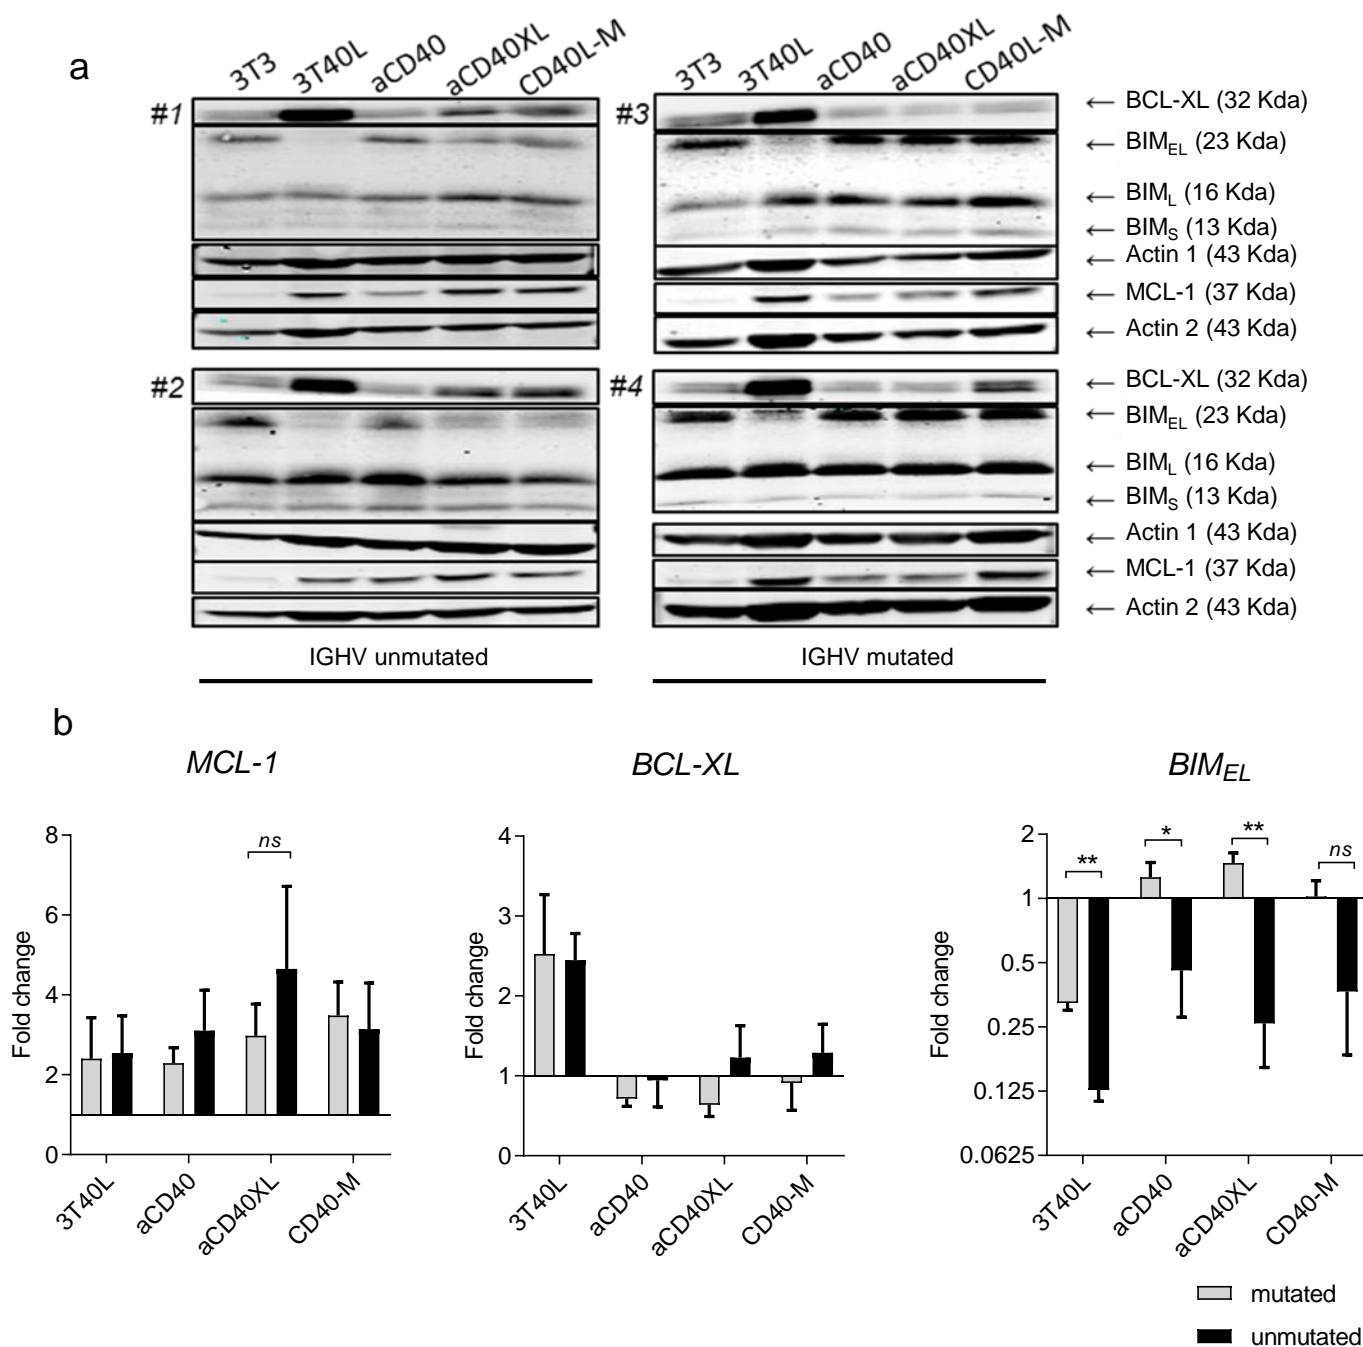

**Figure 2. Regulation of BCL-2 family upon distinct modes of CD40 stimulation and comparison between IgHV status of CLL patients. A)** Changes in expression of apoptosis regulators (BCL-XL, MCL-1 and BIM) were monitored by western blot, after 48 h stimulation. Results from a representative CLL sample of 8 patients (N = 6 for BIM<sub>EL</sub>). Equal protein loading was confirmed by staining for actin; **B)** Protein quantification measured by background method (Odyssey V3.0) and normalized with actin. Unpaired T-test: \* p < 0.05, \*\* p < 0.01 (mean ± SEM).

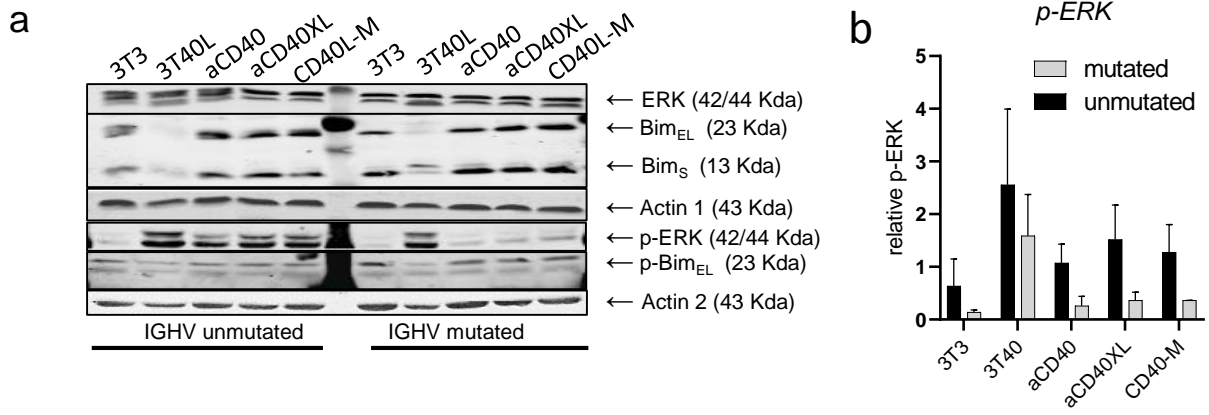

**Figure 3. Differences in Bim<sub>EL</sub> between IgHV mutated and unmutated patients due to changes in ERK phosphorylation and not *p*-Bim expression. A)** Changes in expression of BIM and ERK signalling were monitored by western blot, after 48 h stimulation. Results from a representative CLL sample of 4 patients. Equal protein loading was confirmed by staining for actin. **B)** Relative protein quantification (IgHV unmutated N = 2; IgHV mutated N = 2) measured by ImageJ as a ratio of each protein band relative to the lane's loading control (mean ± SEM).

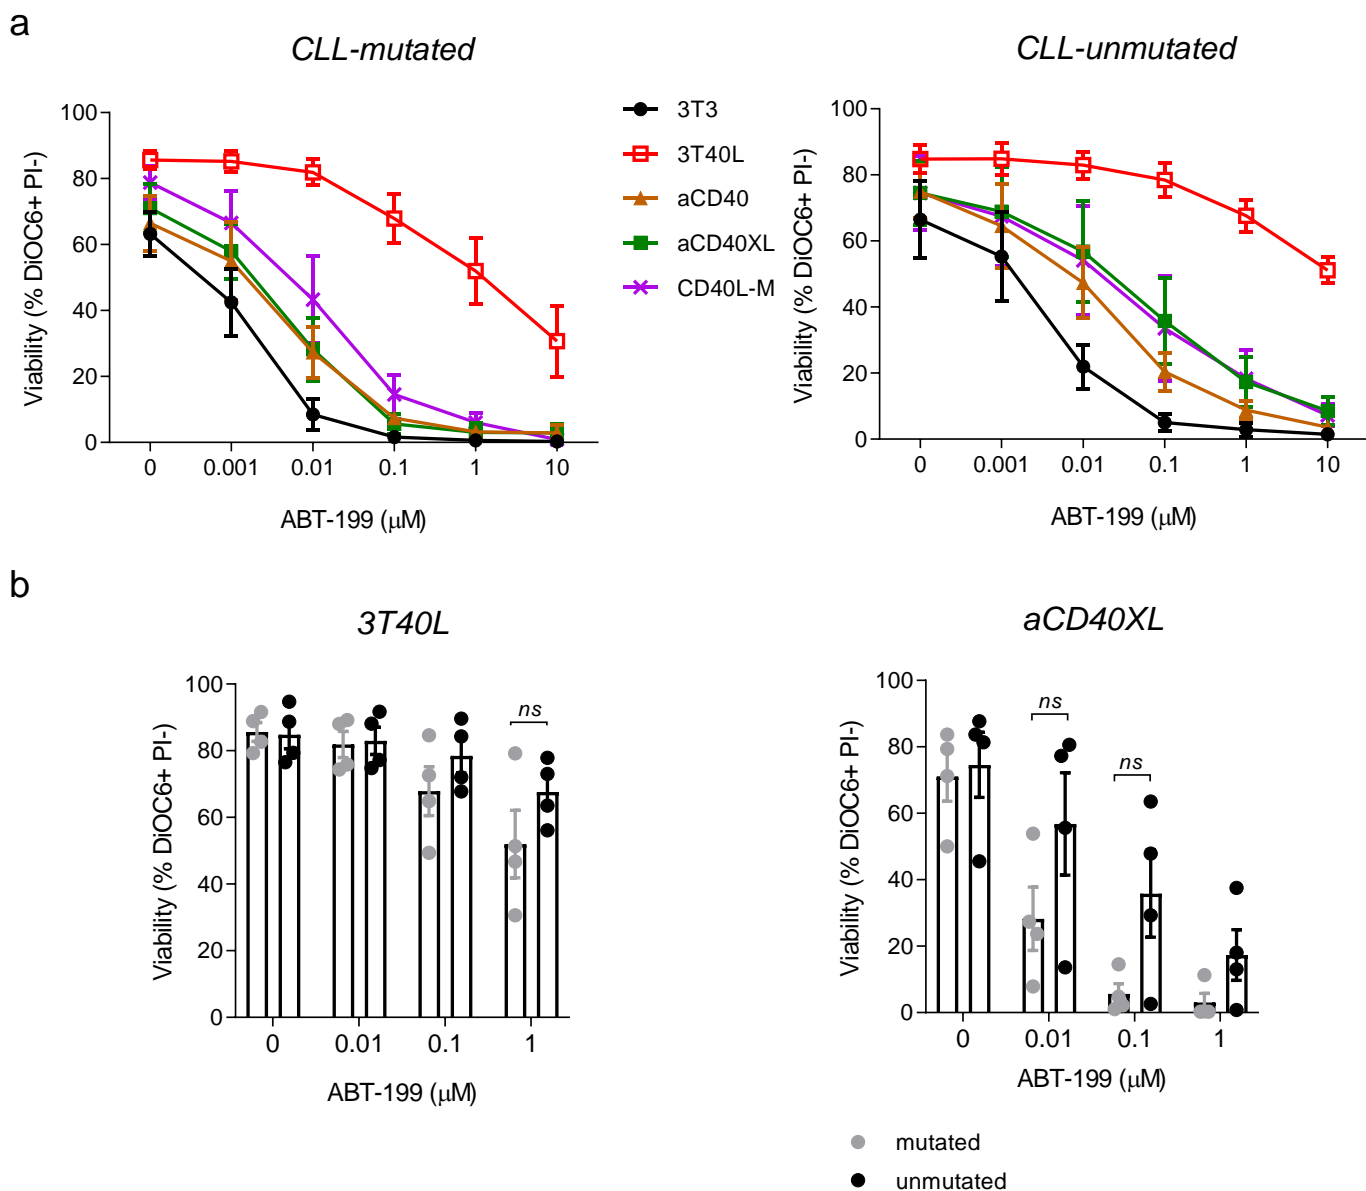

**Figure 4. Reduced induction of venetoclax resistance in CLL cells stimulated with selicrelumab compared to coculture with 3T3 cells expressing CD40L. A)** CLL cells were cultured and CD40 stimulated as previously described. After 48 h cells were treated with venetoclax (ABT-199; 0–10  $\mu$ M) for 24 h. Viability was measured by flow cytometry using DiOC6 and propidium iodine viability stainings. Results from 4 IGHV mutated and 4 unmutated patients. **B)** Data from A depicted side by side to allow comparison of IgHV mutated versus unmutated CLL samples. Bars represent the mean  $\pm$  SEM: *ns* (not-significant, unpaired *t*-test).

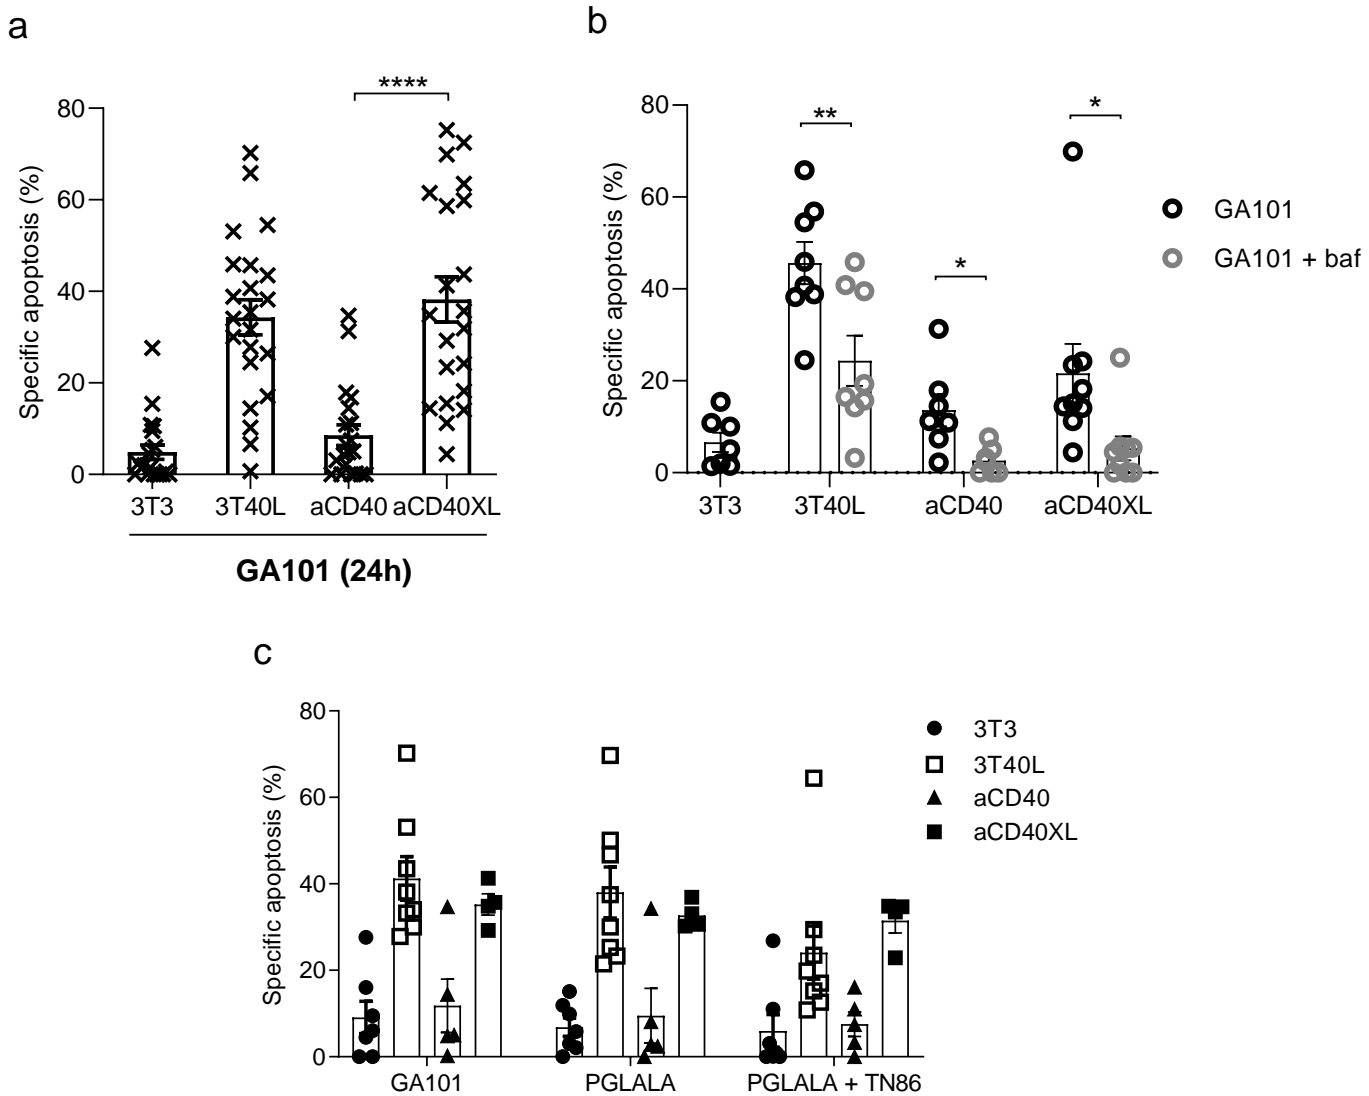

**Figure 5. Crosslinked selicrelumab can sensitize CLL cells for cell death induced by anti-CD20 mAb GA101, as well as for the Fc mutated version GA101-P329GLALA. A,B,C** CLL cells were cultured and CD40 stimulated as previously described for 48 h. **A)** After stimulation, cells were incubated with GA101 for 24 h, viability was measured as previously described and specific apoptosis was calculated ( $n = 22$ ). Results revealed no differences between IGHV mutated and unmutated patients (non-significant for 3T40L, aCD40 and aCD40XL stimulation). **B)** Stimulated CLL cells were incubated in the presence/ absence of bafilomycin for 1 h and treated with GA101 for 24 h ( $n = 7 \leq 9$ ). **C)** Stimulated CLL cells were incubated with GA101 and GA101-P329GLALA in the presence of specific crosslinker reagent TN86 for 24 h ( $n = 5 \leq 8$ ). Bars represent the mean  $\pm$  SEM: \*  $p < 0.05$ , \*\*  $p < 0.01$ , \*\*\*\*  $p < 0.0001$  (unpaired t-test).

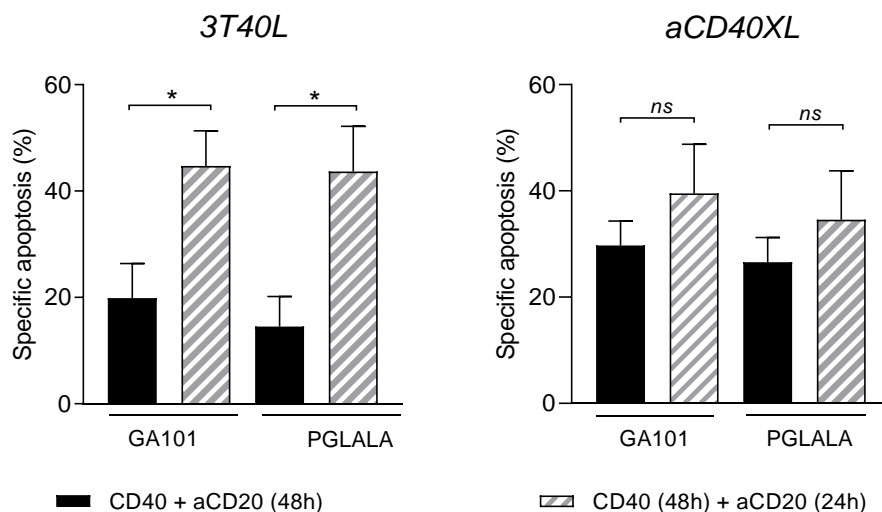

**Figure 6. Order of events: selicrelumab demonstrated no significant difference between co-stimulation and anti-CD20 treatment.** Comparison between CD40 stimulation simultaneously with anti-CD20 mAbs treatment for 48 h, and CD40 stimulation (48 h) before anti-CD20 mAb treatment (24 h), for co-culture system and aCD40XL (n = 6). Bars represent the mean ± SEM: \* p < 0.05 (unpaired t-test).

Delgado R. *et al.*; Co-stimulatory versus cell death aspects of agonistic CD40 monoclonal antibody selicrelumab in Chronic Lymphocytic Leukemia. **Supplementary material**

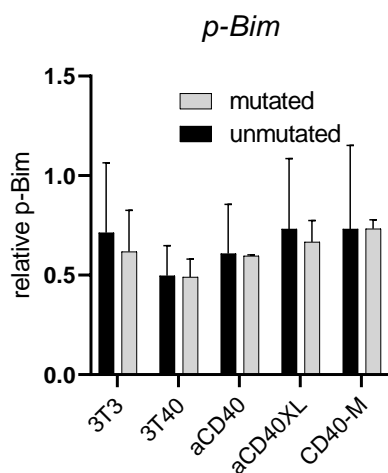

### Supplementary Figure 1

Changes in expression phosphorylated Bim (p-Bim) monitored by western blot, after 48 h stimulation, as indicated – similar to samples in Figure 3. Relative protein quantification (IgHV unmutated N = 2; IgHV mutated N = 2) measured by ImageJ as a ratio of each protein band relative to the lane's loading control (mean ± SEM).

**Supplementary Figure 2.** No correlation between cell death and CD95/CD20 levels in CLL.

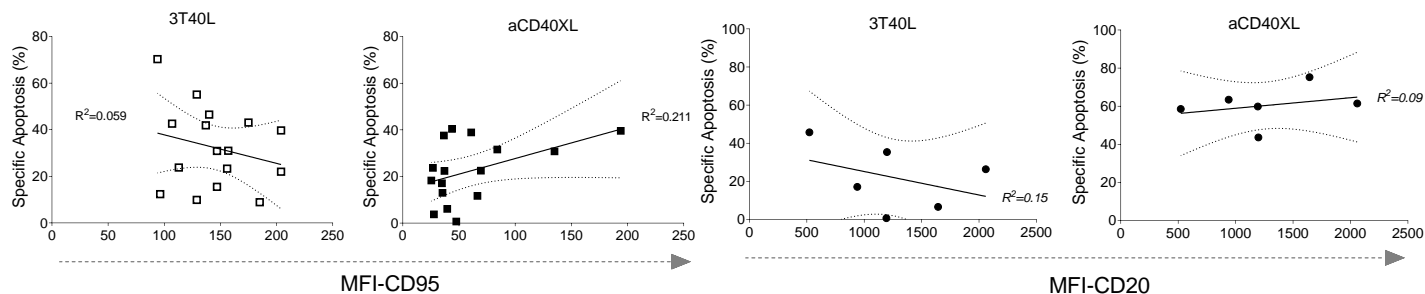

**Supplementary Figure 3.** Cathepsin D inhibitor (pepstatin A) show no effect on cell death by GA101.

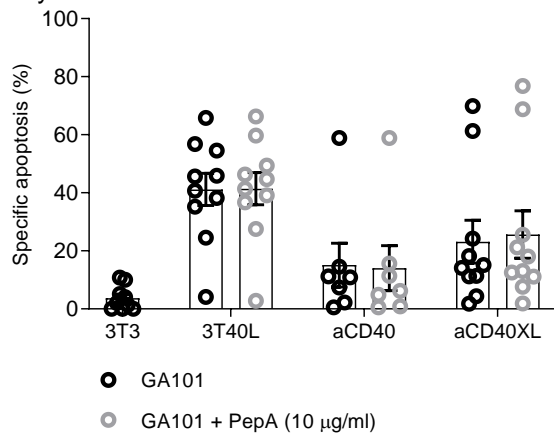

**Supplementary Figure 4.** Lysosomal mass was not affected by RIPK1/3 and cathepsin D inhibitor.

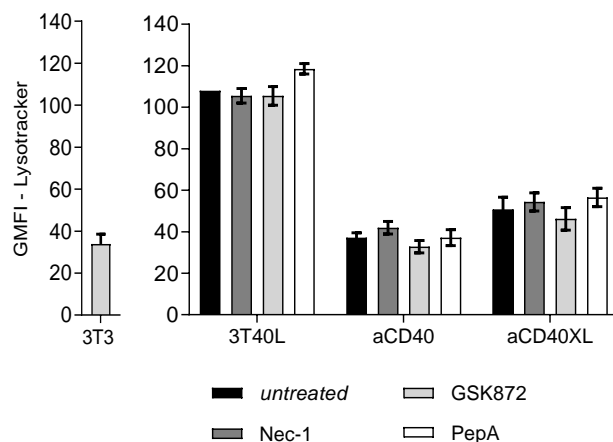

**Supplementary Figure 5.** RIPK-3 (GSK'872) and RIPK-1 (necrostatin-1) inhibitors did not show effects on cell death mediated by GA101.

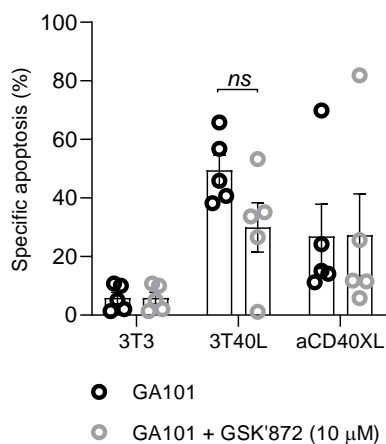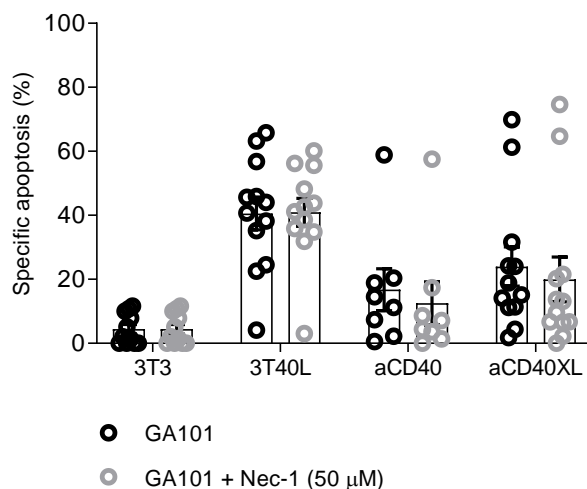

Supplement: s1 [file s1]
